# Supplementary material for: Intrinsic ferromagnetism in two-dimensional 1T-MX2monolayers with tunable magnetocrystalline anisotropy
Source: Royal Society of Chemistry journal article supplement (doi:10.1039/d3cp03600f), 2023-01-01
Supplement: d3cp03600f1.pdf [file d3cp03600f1.pdf]

**Electronic Supplementary Information for Intrinsic ferromagnetism in two-dimensional 1T-MX<sub>2</sub> monolayers with tunable magnetocrystalline anisotropy**

Yonghao Wang,<sup>1</sup> Zesen Lei,<sup>1</sup> Meng Guo,<sup>2</sup> Qilong Sun<sup>1,\*</sup>, Cui Jin,<sup>1</sup> Ruishan Tan,<sup>1</sup> and Ying Dai<sup>3,†</sup>

<sup>1</sup> School of Science, Shandong Jianzhu University, Jinan, Shandong 250101, China

<sup>2</sup> Qilu University of Technology (Shandong Academy of Sciences), Shandong Computer Science Center (National Supercomputer Center in Jinan), Jinan, Shandong 250103, China

<sup>3</sup> School of Physics, State Key Laboratory of Crystal Materials, Shandong University, Jinan 250100, China

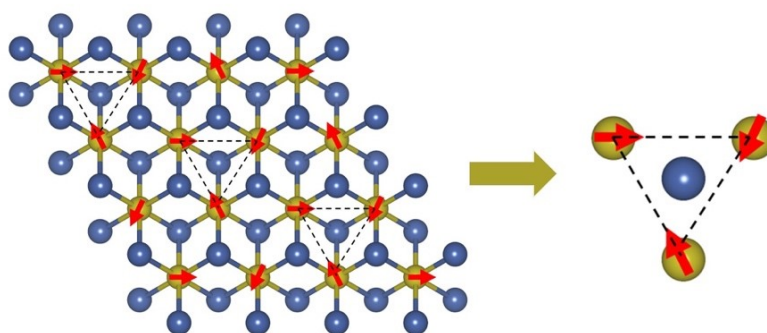

**Figure S1.** Noncollinear antiferromagnetic configuration of the 1T-MX<sub>2</sub> monolayer constructed. The yellow and blue spheres denote M and X atoms, respectively. These red arrows represent spin vectors of the three atoms and are at 120° to each other.

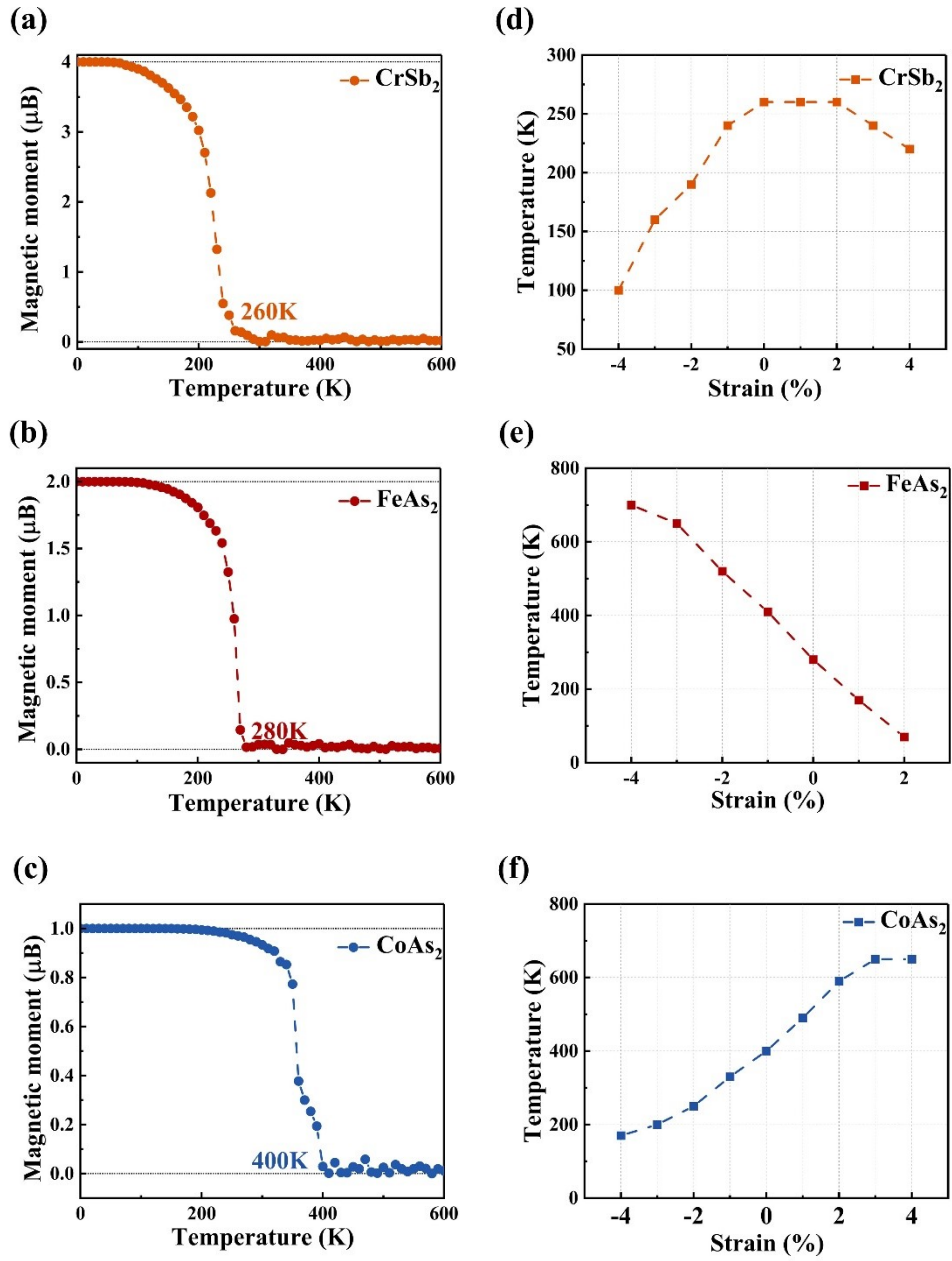

**Figure S2.** The magnetic moments of the (a) 1T-CrSb<sub>2</sub>, (b) 1T-FeAs<sub>2</sub> and (c) 1T-CoAs<sub>2</sub> monolayers as a function of temperature. (d-f) The corresponding strain dependence of Curie temperature for the three FM monolayers.

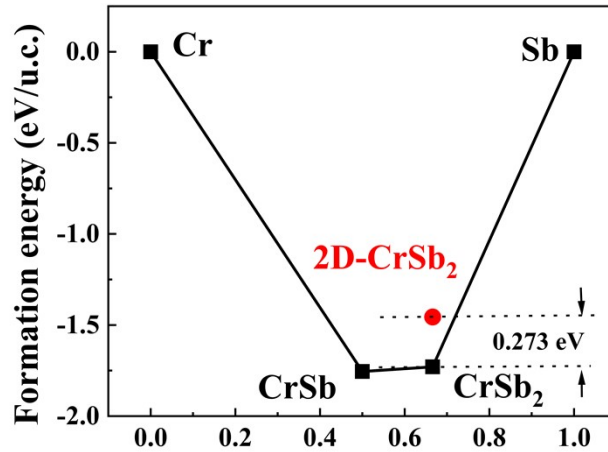

**Figure S3.** Calculated formation energy convex hull for Cr-Sb systems. The elemental reference states are taken from its bulk (bcc-Cr, trigonal-Sb). The stable intermediate phases of Cr-X systems are selected from the databases of Materials Project<sup>[1]</sup> (<https://materialsproject.org/materials>).

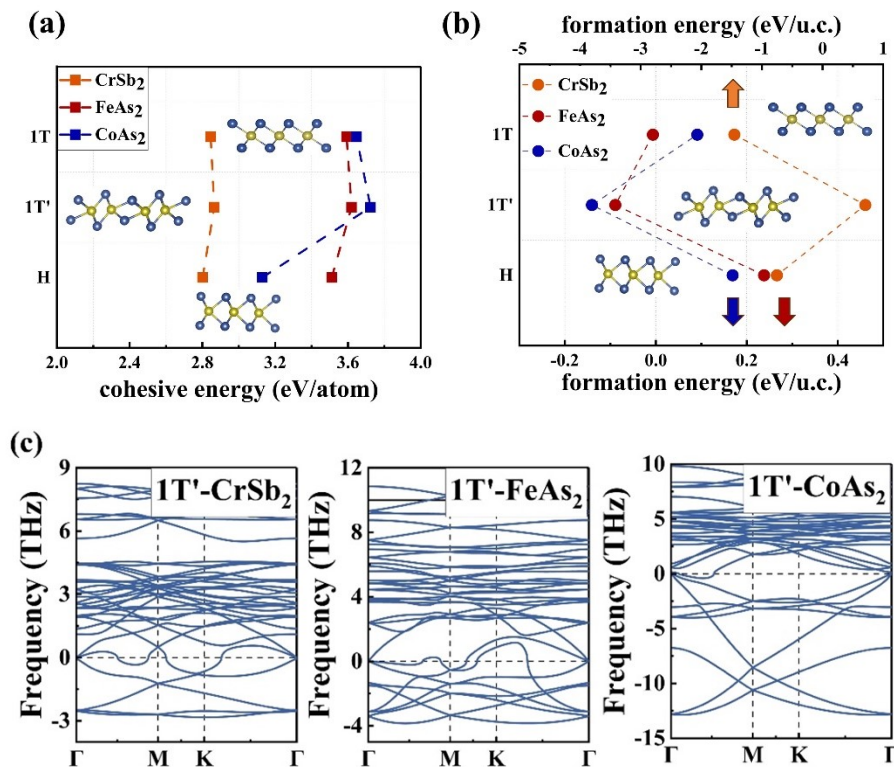

**Figure S4.** The calculated cohesive energy (a) and formation energy (b) of three representative 2D  $\text{MX}_2$  crystals where the insets show their corresponding crystal

structures. The arrows indicate the energy range of the three materials. (c) The phonon spectrum of three 2D materials with 1T' phase.

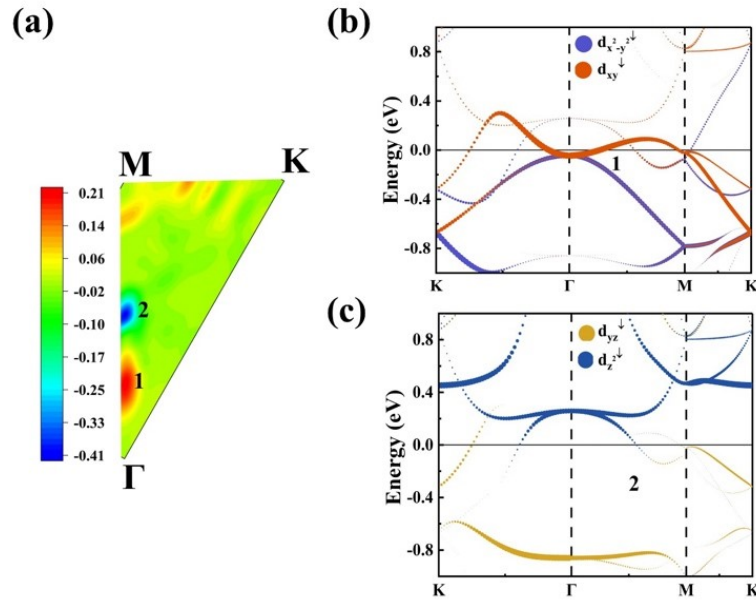

**Figure S5.** (a) The k-resolved MCA (in erg/cm<sup>2</sup>) in the 2D BZ for 1T-CoAs<sub>2</sub>. Energy- and k-resolved distributions of (b)  $d_{xy}$  and  $d_{x^2-y^2}$  orbitals and (c)  $d_{yz}$  and  $d_{z^2}$  of the minority-spin bands along the symmetry directions for Co atom. The numerals represent the k-points where the MCA has large positive or negative contributions.

1. A. Jain, S. P. Ong, G. Hautier, W. Chen, W. D. Richards, S. Dacek, S. Cholia, D. Gunter, D. Skinner, G. Ceder, K. A. Persson, Commentary: The Materials Project: a materials genome approach to accelerating materials innovation. *APL Mater.* 2013, **1**, 011002.
